# Supplementary material for: Virus Infection of Plants Alters Pollinator Preference: A Payback for Susceptible Hosts?
Source: PubMed Central journal article supplement (PMC4981420; doi:10.1371/journal.ppat.1005790), 2016-08-11
Supplement: ppat.1005790.s009.pdf [file ppat.1005790.s009.pdf]

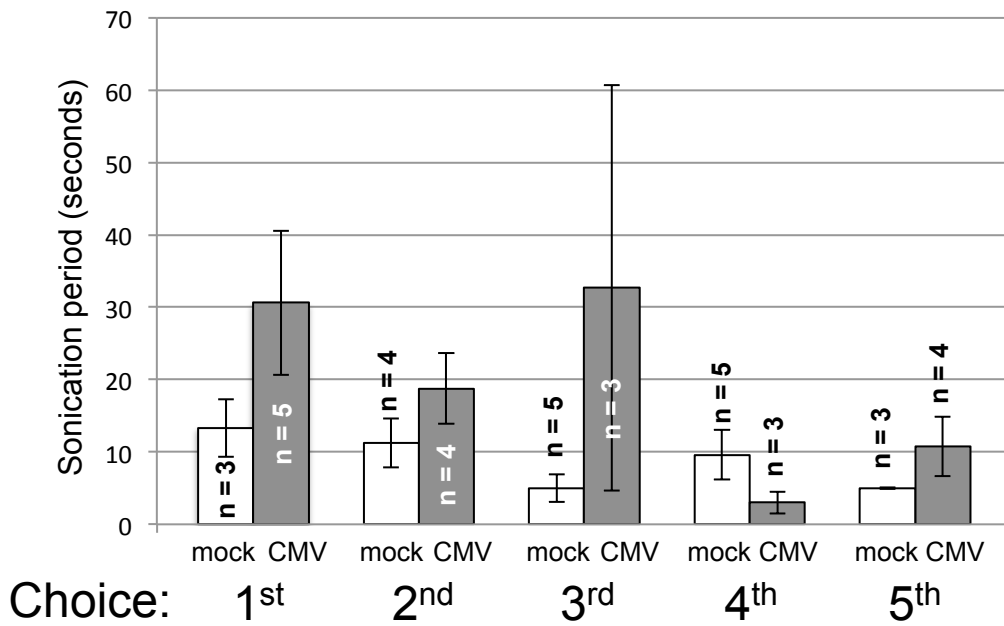

**S6 Figure Choices and timings for buzz pollination by bumblebees** Bees spent longer buzz-pollinating (sonicating) flowers on CMV-infected tomato plants. Single bees were released into the flight arena containing three mock-inoculated and three CMV-infected flowering tomato plants (Fig 6; S8 Figure). The time each bee spent buzz-pollinating its first five choices of flower was measured using a stopwatch. n= the number of bees making each choice.
