# Supplementary material for: Virus Infection of Plants Alters Pollinator Preference: A Payback for Susceptible Hosts?
Source: PLoS Pathog. 2016 Aug 11;12(8):e1005790. doi: 10.1371/journal.ppat.1005790 (PMC4981420; doi:10.1371/journal.ppat.1005790)
Supplement: S1 Table — (XLSX) [file ppat.1005790.s001.xlsx]

## Sheet: Tomato flowering mock-CMVFny
Bumble bee number	Choice for mock-inoculated tomato	Choice for CMV-infected tomato
1	0	1
2	1	0
3	0	1
4	1	0
5	1	0
6	1	0
7	0	1
8	0	1
9	0	1
10	0	1
11	0	1
12	0	1
13	0	1
14	0	1
15	0	1
16	1	0
17	0	1
18	0	1
19	0	1
20	1	0
21	0	1
22	0	1
23	1	0
24	0	1
25	0	1
26	0	1

## Sheet: Tomato non-flowering mock-CMVF
Bumble bee number	Choice for mock-inoculated tomato	Choice for CMV-infected tomato
1	0	1
2	0	1
3	0	1
4	0	1
5	0	1
6	0	1
7	0	1
8	0	1
9	1	0
10	0	1
11	0	1
12	0	1
13	1	0
14	0	1
15	0	1
16	0	1
17	1	0
18	0	1
19	0	1
20	1	0
21	0	1
22	0	1
23	0	1
24	0	1
25	1	0
26	0	1

## Sheet: Tomato non-flower mock-CMVd2b
Bumble bee number	Choice for mock-inoculated tomato	Choice for CMVd2b-infected tomato
1	1	0
2	1	0
3	0	1
4	1	0
5	0	1
6	0	1
7	1	0
8	0	1
9	0	1
10	1	0
11	0	1
12	1	0
13	0	1
14	0	1
15	0	1
16	1	0
17	0	1
18	1	0
19	0	1
20	1	0
21	0	1
22	1	0
23	1	0
24	0	1
25	0	1
26	1	0
27	1	0
28	1	0
29	0	1
30	0	1

## Sheet: Tomato non-flower CMV-CMVd2b
Bumble bee number	Choice for CMVd2b-infected tomato	Choice for CMV-infected tomato
1	0	1
2	1	0
3	0	1
4	0	1
5	0	1
6	0	1
7	1	0
8	0	1
9	1	0
10	0	1
11	0	1
12	0	1
13	0	1
14	1	0
15	0	1
16	0	1
17	0	1
18	1	0
19	0	1
20	1	0
21	0	1
22	1	0
23	0	1
24	0	1
25	0	1
26	1	0
27	0	1
28	1	0
29	0	1
30	0	1

## Sheet: Arabidopsis mock-CMV
Bumble bee number	Choice for mock-inoculated Arabidopsis	Choice for CMV-infected Arabidopsis
1	0	1
2	0	1
3	1	0
4	0	1
5	0	1
6	1	0
7	0	1
8	1	0
9	1	0
10	1	0
11	1	0
12	0	1
13	1	0
14	0	1
15	1	0
16	1	0
17	1	0
18	0	1
19	0	1
20	1	0
21	0	1
22	0	1
23	1	0
24	0	1
25	1	0
26	0	1
27	1	0
28	0	1
29	1	0
30	1	0
31	1	0
32	1	0
33	1	0
34	0	1

## Sheet: Tomato non-flower mock-CMV0187
Bumble bee number	choice for CMV PV0187 infected tomato	choice for mock-inocuated tomato
1	1	0
2	0	1
3	1	0
4	1	0
5	0	1
6	0	1
7	1	0
8	0	1
9	1	0
10	1	0
11	1	0
12	0	1
13	1	0
14	0	1
15	0	1
16	1	0
17	1	0
18	1	0
19	1	0
20	1	0
21	1	0
22	1	0
23	1	0
24	1	0
