# Supplementary material for: Virus Infection of Plants Alters Pollinator Preference: A Payback for Susceptible Hosts?
Source: PLOS journal article supplement (doi:10.1371/journal.ppat.1005790), 2016-08-11
Supplement: S5 (10.1371/journal.ppat.1005790.s005) [file journal.ppat.1005790.s005]

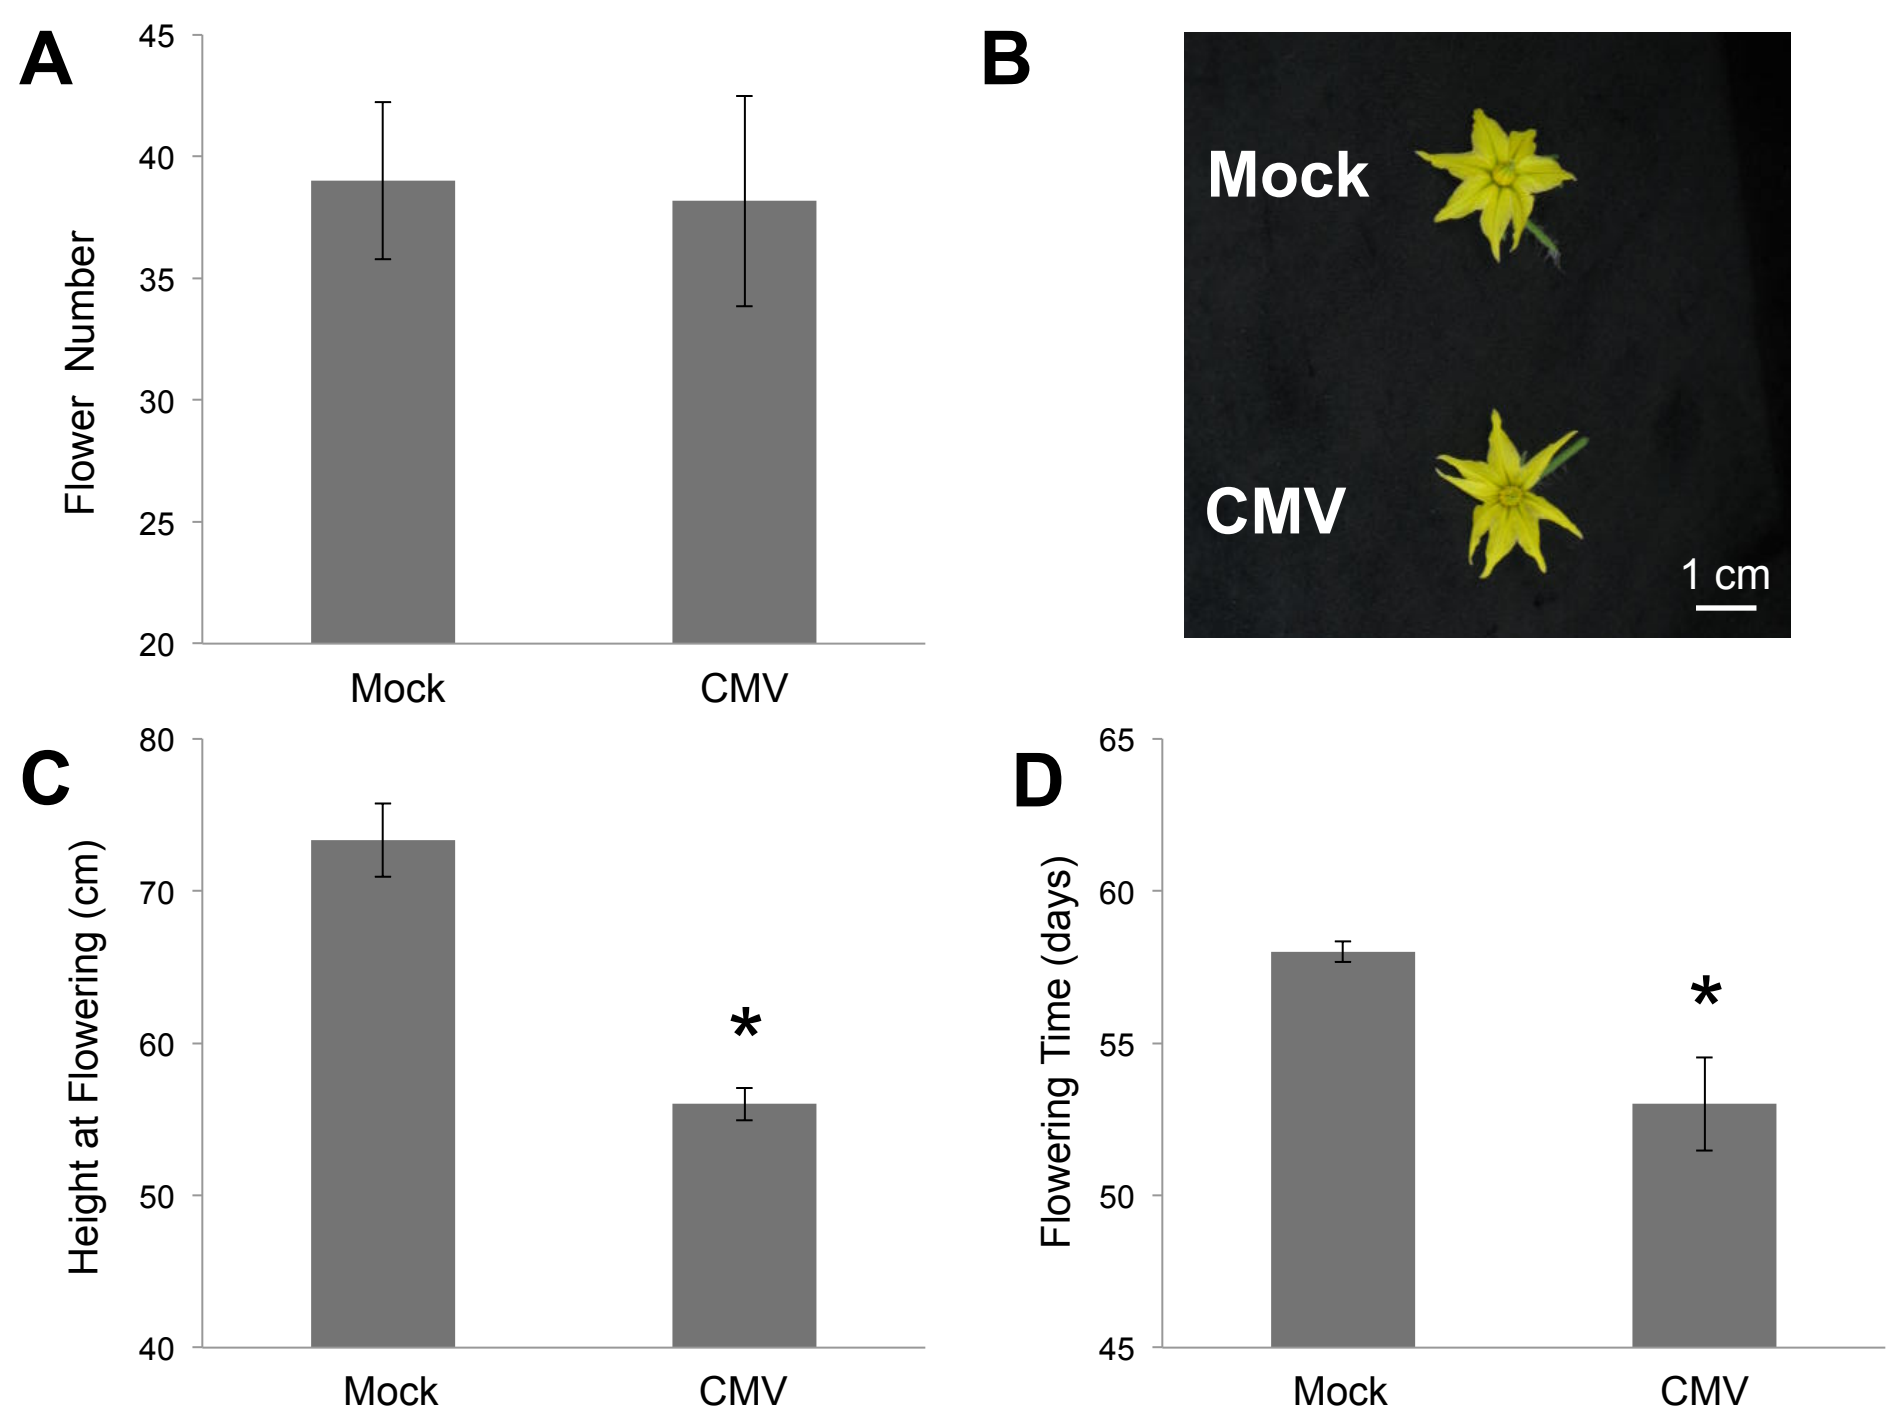

**S2 Figure Impacts of CMV-Fny on tomato flowering characteristics** A. The tomato-cucumber mosaic virus (CMV) pathosystem is a virus-plant interaction in which infection with CMV-Fny does not greatly affect the mean number of flowers produced per plant in infected (CMV) versus mock-inoculated (Mock) tomato plants ( $n = 6$  plants; one-way ANOVA:  $F(1,10) = 0.024$ ,  $p = 0.8803$ ). B. Infection with CMV-Fny does not greatly affect the morphology of tomato flowers. Typical flowers from mock-inoculated (Mock) plants and plants infected with CMV-Fny (CMV) are shown. C. Infection with CMV-Fny stunts host growth. The mean height of plants at the point of flowering is shown for plants infected with CMV-Fny (CMV) versus mock-inoculated (Mock) plants ( $n = 4$  plants and  $n = 3$  plants, respectively; one-way ANOVA:  $F(1,5) = 52.92$ ,  $p = 0.0077$ ) (C). (D) CMV infection accelerated flowering; decreasing time to flowering (days post-sowing;  $n = 3$  plants [CMV-Fny] and  $n = 4$  plants [Mock]; one-way ANOVA:  $F(1,5) = 10.71$ ,  $p = 0.0221$ ). Mock, mock-inoculated; CMV, infected with CMV-Fny. Asterisks indicate significant differences. Error bars represent the standard error of the mean.
